# Supplementary material for: Hurricane María tripled stem breaks and doubled tree mortality relative to other major storms
Source: PubMed Central journal article supplement (PMC6433954; doi:10.1038/s41467-019-09319-2), 2019-03-25
Supplement: 41467_2019_9319_MOESM1_ESM.pdf [file 41467_2019_9319_MOESM1_ESM.pdf]

1

2 **HURRICANE MARÍA TRIPLED STEM BREAKS AND DOUBLED TREE**

3 **MORTALITY RELATIVE TO OTHER MAJOR STORMS**

4

5 Uriarte et al.

6 **SUPPLEMENTARY MATERIALS**

7 **Supplementary Table 1.** Number of stems with dbh  $\geq$  10 cm that were assessed for damage after  
 8 Hurricanes Hugo, Georges, and María. For context on forest composition at the time Georges struck, we  
 9 provide number of stems  $\geq$  10 cm in the 1995 LFDP census.

| Species                         | Family         | Code   | No. of stems in Hugo | No. stems in Georges (1995 census) | No. of stems in Maria |
|---------------------------------|----------------|--------|----------------------|------------------------------------|-----------------------|
| <i>Alchornea floribunda</i>     | Euphorbiaceae  | ALCFLO | 92                   | 15 (79)                            | 75                    |
| <i>Alchornea latifolia</i>      | Euphorbiaceae  | ALCLAT | 204                  | 27 (188)                           | 132                   |
| <i>Andira inermis</i>           | Leguminosae    | ANDINE | 73                   | 17 (81)                            | 86                    |
| <i>Buchenavia capitata</i>      | Combretaceae   | BUCCAP | 190                  | 34 (175)                           | 154                   |
| <i>Byrsonima spicata</i>        | Malpighiaceae  | BYRSPI | 155                  | 31 (147)                           | 94                    |
| <i>Casearia arborea</i>         | Salicaceae     | CASARB | 1,053                | 167 (1,014)                        | 782                   |
| <i>Casearia sylvestris</i>      | Salicaceae     | CASSYL | 208                  | 44 (201)                           | 59                    |
| <i>Cecropia schreberiana</i>    | Moraceae       | CECSCH | 163                  | 248 (1,269)                        | 818                   |
| <i>Cordia sulcata</i>           | Boraginaceae   | CORSUL | 145                  | 28 (149)                           | 100                   |
| <i>Dacryodes excelsa</i>        | Burseraceae    | DACEXC | 1,023                | 201 (1,079)                        | 1,135                 |
| <i>Drypetes glauca</i>          | Euphorbiaceae  | DRYGLA | 157                  | 32 (152)                           | 104                   |
| <i>Guarea guidonia</i>          | Meliaceae      | GUAGUI | 306                  | 59 (315)                           | 272                   |
| <i>Guettarda valenzuelana</i>   | Rubiaceae      | GUEVAL | 113                  | 25 (107)                           | 67                    |
| <i>Homalium racemosum</i>       | Salicaceae     | HOMRAC | 179                  | 23 (178)                           | 151                   |
| <i>Inga laurina</i>             | Leguminosae    | INGLAU | 557                  | 83 (498)                           | 349                   |
| <i>Laetia procera</i>           | Salicaceae     | LAEPRO | 54                   | 6 (56)                             | 74                    |
| <i>Manilkara bidentata</i>      | Sapotaceae     | MANBID | 670                  | 142 (694)                          | 749                   |
| <i>Matayba dominguensis</i>     | Sapindaceae    | MATDOM | 269                  | 56 (251)                           | 152                   |
| <i>Ocotea leucoxylon</i>        | Lauraceae      | OCOLEU | 164                  | 34 (163)                           | 96                    |
| <i>Prestoea acuminata</i>       | Palmae         | PREACU | 4,415                | 1,201 (7,401)                      | 8,151                 |
| <i>Schefflera morototoni</i>    | Araliaceae     | SCHMOR | 202                  | 46 (214)                           | 480                   |
| <i>Sloanea berteriana</i>       | Elaeocarpaceae | SLOBER | 508                  | 127 (542)                          | 454                   |
| <i>Tabebuia heterophylla</i>    | Bignoniaceae   | TABHET | 330                  | 65 (317)                           | 148                   |
| <i>Tetragastris balsamifera</i> | Burseraceae    | TETBAL | 125                  | 24 (126)                           | 146                   |

11 **Supplementary Table 2.** Percent of stems broken, uprooted, and immediately killed for the study  
12 species in Hugo, Georges, and María. Note that for Georges immediate mortality was not assessed and  
13 stem break and uprooting rates are based on the subset of stems assessed for damage (see methods for  
14 details).

15

| Damage                | Hugo | Georges | María |
|-----------------------|------|---------|-------|
| % stem break          | 8.45 | 4.55    | 17.46 |
| % uprooting           | 6.69 | 1.54    | 6.80  |
| % immediate mortality | 7.71 | NA      | 15.40 |

16

17

18

**Supplementary Table 3.** Percent of stems broken, uprooted, and immediately killed for study species in Hugo, Georges, and Maria. Annual rates over a period (2011-2016) free of severe storms (NSS) are also shown. For Georges we only provide rates for species with  $\geq 40$  stems assessed for damage.

| Species code | % break Hugo | % break Georges | % break Maria | % break NSS. | % Uproot. Hugo | % Uproot. Georges | % Uproot. Maria | % Uproot. Georges | % Uproot. NSS | % mortality Hugo | % mortality Maria | % mortality NSS. |
|--------------|--------------|-----------------|---------------|--------------|----------------|-------------------|-----------------|-------------------|---------------|------------------|-------------------|------------------|
| ALCFLO       | 13.04        |                 | 40.00         | 0.88         | 25.00          |                   | 17.00           |                   | 0.88          | 11.9             | 8.01              | 0.29             |
| ALCLAT       | 12.25        |                 | 44.00         | 3.55         | 7.35           |                   | 8.00            |                   | 0.24          | 4.41             | 10.61             | 0.71             |
| ANDINE       | 5.48         |                 | 40.00         | 0.47         | 2.74           |                   | 0.00            |                   | 0.00          | 0                | 6.97              | 0.00             |
| BUCCAP       | 4.21         |                 | 32.00         | 1.29         | 13.16          |                   | 13.00           |                   | 0.29          | 0.5              | 15.19             | 0.14             |
| BYRSPI       | 5.81         |                 | 28.00         | 0.42         | 9.68           |                   | 12.00           |                   | 0.63          | 7.74             | 18.08             | 0.21             |
| CASARB       | 10.45        | 11.38           | 23.00         | 2.55         | 20.23          | 4.19              | 14.00           | 4.19              | 0.34          | 8.73             | 17.52             | 1.15             |
| CASSYL       | 9.62         | 0.00            | 20.00         | 4.87         | 8.65           | 0.00              | 6.00            |                   | 0.00          | 0                | 11.86             | 1.39             |
| CECSCH       | 33.08        | 6.85            | 30.00         | 4.17         | 17.69          | 3.23              | 25.00           | 3.23              | 0.51          | 40.49            | 55.13             | 2.42             |
| CORSUL       | 8.28         |                 | 24.00         | 2.06         | 0.00           |                   | 6.00            |                   | 0.00          | 2.06             | 4                 | 0.37             |
| DACEXC       | 4.30         | 5.47            | 19.00         | 0.20         | 1.08           | 0.00              | 3.00            | 0.00              | 0.02          | 1.46             | 5.02              | 0.11             |
| DRYGLA       | 5.73         |                 | 27.00         | 1.95         | 8.92           |                   | 13.00           |                   | 0.33          | 4.45             | 14.42             | 1.46             |
| GUAGUI       | 7.19         | 5.08            | 38.00         | 1.05         | 6.86           | 1.69              | 4.00            | 1.69              | 0.00          | 1.31             | 2.94              | 0.90             |
| GUEVAL       | 8.85         |                 | 27.00         | 1.39         | 6.19           |                   | 11.00           |                   | 0.00          | 3.53             | 14.92             | 1.11             |
| HOMRAC       | 2.79         |                 | 34.00         | 1.74         | 3.35           |                   | 3.00            |                   | 0.25          | 2.23             | 4.63              | 0.50             |
| INGLAU       | 15.98        | 16.87           | 27.00         | 1.56         | 8.26           | 1.20              | 8.00            | 1.20              | 0.23          | 12.92            | 10.03             | 0.40             |
| LAEPRO       | 5.56         |                 | 36.00         | 0.82         | 0.00           |                   | 8.00            |                   | 0.00          | 3.71             | 18.92             | 1.10             |
| MANBID       | 6.27         | 0.70            | 23.00         | 0.32         | 3.58           | 0.00              | 4.00            | 0.00              | 0.03          | 1.64             | 3.47              | 0.11             |
| MATDOM       | 3.72         | 5.35            | 39.00         | 1.45         | 8.55           | 0.00              | 9.00            |                   | 0.12          | 7.06             | 17.76             | 0.48             |
| OCOLEU       | 13.41        |                 | 32.00         | 3.90         | 12.80          |                   | 12.00           |                   | 0.12          | 1.82             | 17.71             | 0.85             |
| PREACU       | 5.64         | 0.75            | 5.00          | 0.47         | 1.11           | 0.42              | 2.00            | 0.42              | 0.02          | 7.1              | 14.67             | 0.60             |
| SCHMOR       | 14.36        | 10.87           | 31.00         | 1.01         | 7.43           | 4.35              | 13.00           |                   | 0.16          | 14.85            | 25                | 1.21             |
| SLOBER       | 10.24        | 6.55            | 29.00         | 1.47         | 4.13           | 0.00              | 8.00            | 4.35              | 0.12          | 3.54             | 9.03              | 1.06             |
| TABHET       | 6.67         | 7.69            | 37.00         | 3.14         | 2.42           | 1.54              | 1.00            | 1.54              | 0.21          | 5.15             | 22.3              | 1.88             |

|         |             |             |              |             |             |             |             |             |             |             |              |             |
|---------|-------------|-------------|--------------|-------------|-------------|-------------|-------------|-------------|-------------|-------------|--------------|-------------|
| TETBAL  | 2.40        |             | 20.00        | 0.28        | 6.40        |             | 5.00        |             | 0.14        | 3.2         | 4.11         | 0.28        |
| Average | <b>8.97</b> | <b>6.56</b> | <b>29.38</b> | <b>1.71</b> | <b>7.73</b> | <b>1.51</b> | <b>8.54</b> | <b>1.85</b> | <b>0.19</b> | <b>6.24</b> | <b>13.85</b> | <b>0.78</b> |

**Supplementary Table 4.** Maximum dbh (cm) at the time each storm struck the forest and mean wood density (g. cm<sup>-3</sup>) for the 24 study species.

| Species code | Hugo<br>max<br>dbh | Georges<br>max<br>dbh | Maria<br>max<br>dbh | Wood<br>density |
|--------------|--------------------|-----------------------|---------------------|-----------------|
| ALCFLO       | 75.8               | 78.5                  | 54                  | 0.43            |
| ALCLAT       | 66                 | 64                    | 72                  | 0.40            |
| ANDINE       | 55.1               | 57.2                  | 58                  | 0.65            |
| BUCCAP       | 150.9              | 151.5                 | 160                 | 0.64            |
| BYRSPI       | 68                 | 69.4                  | 78                  | 0.61            |
| CASARB       | 48.7               | 43.3                  | 36                  | 0.58            |
| CASSYL       | 27.2               | 25.7                  | 16                  | 0.71            |
| CECSCH       | 48                 | 47.6                  | 56                  | 0.26            |
| CORSUL       | 33.5               | 32.9                  | 34                  | 0.61            |
| DACEXC       | 82.2               | 82.4                  | 88                  | 0.53            |
| DRYGLA       | 38.2               | 39.7                  | 40                  | 0.67            |
| GUAGUI       | 96.3               | 99.3                  | 107                 | 0.59            |
| GUEVAL       | 65.7               | 66.2                  | 42                  | 0.60            |
| HOMRAC       | 110.5              | 118                   | 103                 | 0.79            |
| INGLAU       | 87                 | 81.1                  | 78                  | 0.63            |
| LAEPRO       | 50.2               | 50.5                  | 47                  | 0.64            |
| MANBID       | 78.7               | 80                    | 90                  | 0.86            |
| MATDOM       | 59                 | 60.5                  | 64                  | 0.69            |
| OCOLEU       | 52                 | 51.1                  | 56                  | 0.46            |
| PREACU       | 42                 | 36.7                  | 23                  | 0.31            |
| SCHMOR       | 75                 | 66.1                  | 53                  | 0.42            |
| SLOBER       | 93.3               | 89.3                  | 94                  | 0.77            |
| TABHET       | 69.2               | 69.9                  | 64                  | 0.66            |
| TETBAL       | 51.8               | 53.5                  | 61                  | 0.53            |

**Supplementary Table 5.** Average estimated probability of breakage, uprooting, and mortality for the study species in Hugo, Georges, and María after accounting for effects of diameter and exposure to wind. Values represent random species effects for mixed models that incorporate diameter and wind exposure.

| Species | Mortality<br>María | Break<br>María | Uprooting<br>María | Mortality<br>Hugo | Break<br>Hugo | Uprooting<br>Hugo |
|---------|--------------------|----------------|--------------------|-------------------|---------------|-------------------|
| ALCFLO  | 0.09               | 0.42           | 0.21               | 0.11              | 0.12          | 0.23              |
| ALCLAT  | 0.11               | 0.45           | 0.10               | 0.05              | 0.12          | 0.07              |
| ANDINE  | 0.08               | 0.39           | 0.02               | 0.02              | 0.06          | 0.03              |
| BUCCAP  | 0.06               | 0.39           | 0.20               | 0.02              | 0.05          | 0.12              |
| BYRSPI  | 0.17               | 0.31           | 0.14               | 0.08              | 0.06          | 0.09              |
| CASARB  | 0.17               | 0.28           | 0.21               | 0.10              | 0.10          | 0.20              |
| CASSYL  | 0.12               | 0.37           | 0.11               | 0.01              | 0.09          | 0.08              |
| CECSCH  | 0.55               | 0.34           | 0.29               | 0.50              | 0.30          | 0.16              |
| CORSUL  | 0.05               | 0.23           | 0.06               | 0.02              | 0.08          | 0.01              |
| DACEXC  | 0.05               | 0.19           | 0.03               | 0.02              | 0.04          | 0.01              |
| DRYGLA  | 0.14               | 0.27           | 0.12               | 0.05              | 0.06          | 0.08              |
| GUAGUI  | 0.04               | 0.42           | 0.05               | 0.02              | 0.07          | 0.06              |
| GUEVAL  | 0.14               | 0.28           | 0.11               | 0.04              | 0.09          | 0.06              |
| HOMRAC  | 0.05               | 0.34           | 0.04               | 0.02              | 0.04          | 0.03              |
| INGLAU  | 0.10               | 0.31           | 0.12               | 0.13              | 0.16          | 0.08              |
| LAEPRO  | 0.18               | 0.37           | 0.09               | 0.04              | 0.07          | 0.02              |
| MANBID  | 0.04               | 0.25           | 0.05               | 0.02              | 0.06          | 0.03              |
| MATDOM  | 0.17               | 0.40           | 0.10               | 0.08              | 0.04          | 0.08              |
| OCOLEU  | 0.17               | 0.40           | 0.16               | 0.03              | 0.13          | 0.12              |
| PREACU  | 0.15               | 0.05           | 0.02               | 0.07              | 0.06          | 0.01              |
| SCHMOR  | 0.25               | 0.34           | 0.17               | 0.16              | 0.14          | 0.07              |
| SLOBER  | 0.09               | 0.34           | 0.11               | 0.05              | 0.10          | 0.04              |
| TABHET  | 0.22               | 0.38           | 0.04               | 0.06              | 0.07          | 0.03              |
| TETBAL  | 0.05               | 0.24           | 0.06               | 0.04              | 0.04          | 0.06              |

**Supplementary Table 6.** Effects of stem diameter on the probability of stem break, uprooting, or immediate mortality in H. Hugo and María. Diameter was scaled prior to analyses so the coefficient represent the change in rates with one standard deviation change in diameter. \* indicates that the effect was significant at  $p=0.05$ . See Fig. 4 for species-specific relationships between stem size and damage and mortality.

| Process             | Hugo         | María        |
|---------------------|--------------|--------------|
| Stem break          | 0.09 (0.09)  | 0.21 (0.06)* |
| Uprooting           | 0.77 (0.11)* | 0.41 (0.09)* |
| Immediate mortality | 1.20 (0.11)* | 0.14 (0.08)  |



**Supplementary Table 7.** R<sup>2</sup> and significance of linear regression models of rates of mortality, uprooting and breakage as a function of wood density during Hurricanes Hugo and María as well as average annual rates in a storm-free period (2011-2016). \*indicates relationship is significant at p=0.10.

| Process      | Conditions       | R <sup>2</sup> | <i>p</i> |
|--------------|------------------|----------------|----------|
| % Mortality  |                  |                |          |
|              | Hugo*            | 0.32           | 0.002    |
|              | Georges          | NA             | NA       |
|              | María*           | 0.23           | 0.01     |
|              | No severe storm  | 0.02           | 0.23     |
| % Stem break |                  |                |          |
|              | Hugo*            | 0.29           | 0.003    |
|              | Georges          | -0.08          | 0.74     |
|              | María            | -0.03          | 0.64     |
|              | No severe storm  | 0.01           | 0.41     |
| % Uprooting  |                  |                |          |
|              | Hugo*            | 0.09           | 0.09     |
|              | Georges          | 0.16           | 0.12     |
|              | María*           | 0.16           | 0.02     |
|              | No severe storms | 0.04           | 0.16     |

**Supplementary Table 8.** Number of stems for the 24 study species that were broken, uprooted or undamaged in Hugo and proportion of delayed mortality recorded in 1995.

| Damage in<br>Hugo 1989 | No. stems<br>alive 1995 | No. stems<br>dead 1995 | Prop. delayed<br>mortality |
|------------------------|-------------------------|------------------------|----------------------------|
| Broken                 | 269                     | 115                    | 0.30                       |
| Uprooted               | 171                     | 213                    | 0.55                       |
| Undamaged              | 9,089                   | 571                    | 0.06                       |

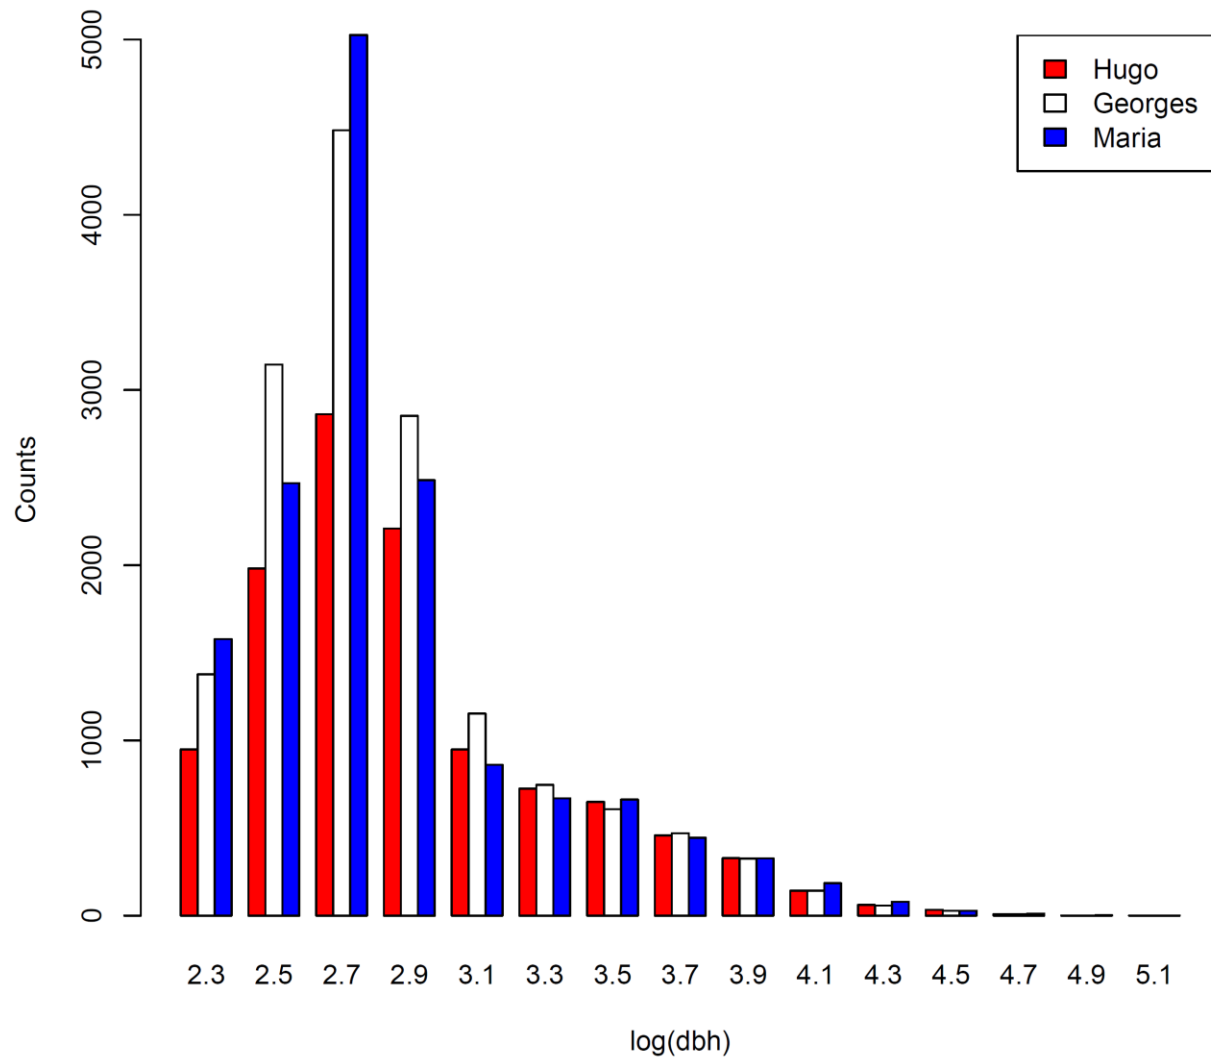

**Supplementary Figure 1.** Diameter size distributions for all stems  $\geq 10$  cm dbh in the LFDP at the time Hurricanes Hugo (red bars), Georges (white bars), and María (blue bars) struck the site. Chi-square tests for differences in the size distributions among any two storms were not significant at  $p=0.05$ .

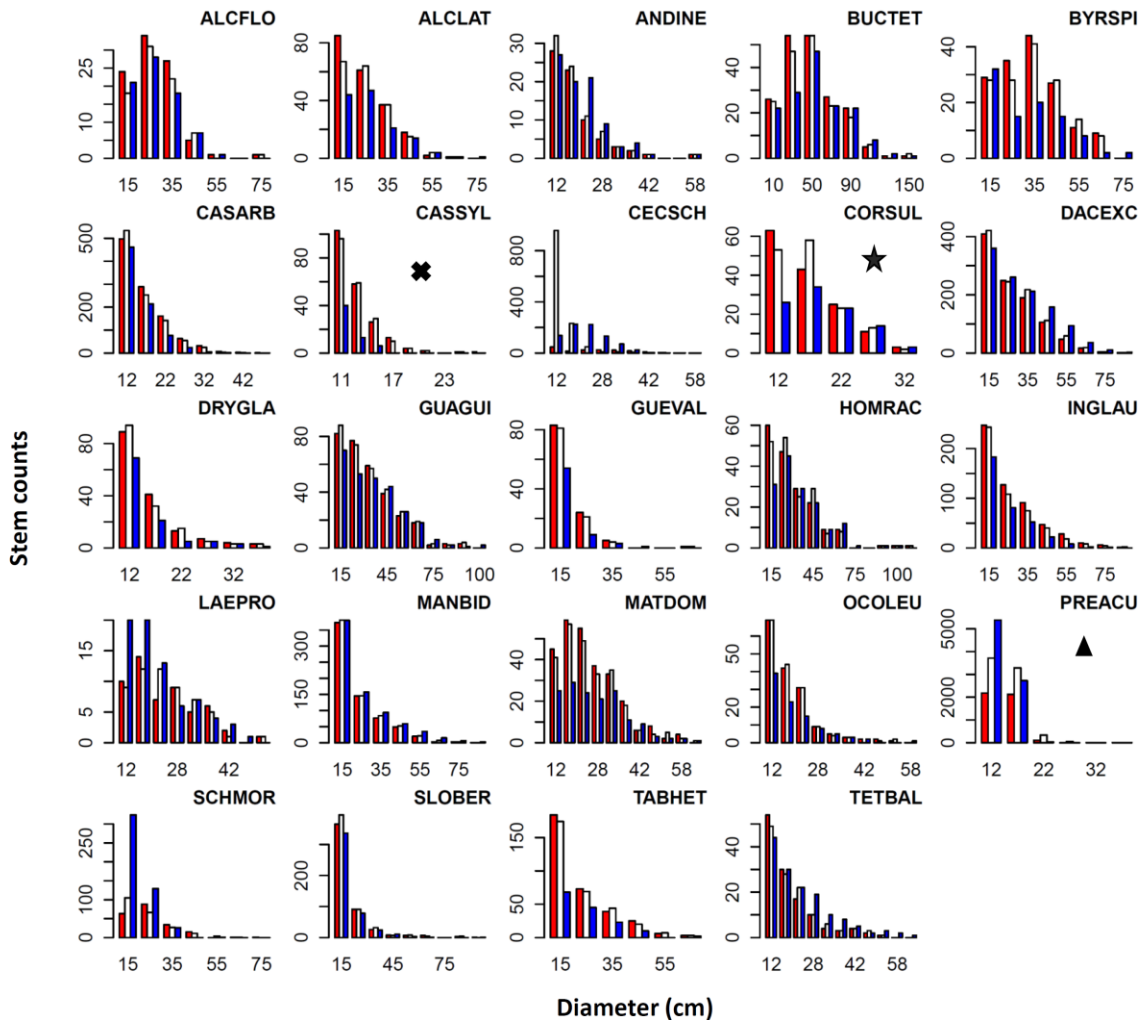

**Supplementary Figure 2.** Diameter size distributions at the time Hurricanes Hugo (red bars), Georges (white bars), and Maria (blue bars) struck the site for the 24 species included in the study. Six letter codes for species are provided in Table S1. A star indicate that  $\chi^2$  tests indicated that size distributions among all two pairs of the three storms were significantly different at  $p=0.05$ . A cross indicates that size distributions between Georges and Hugo and a triangle between Hugo and María differed.

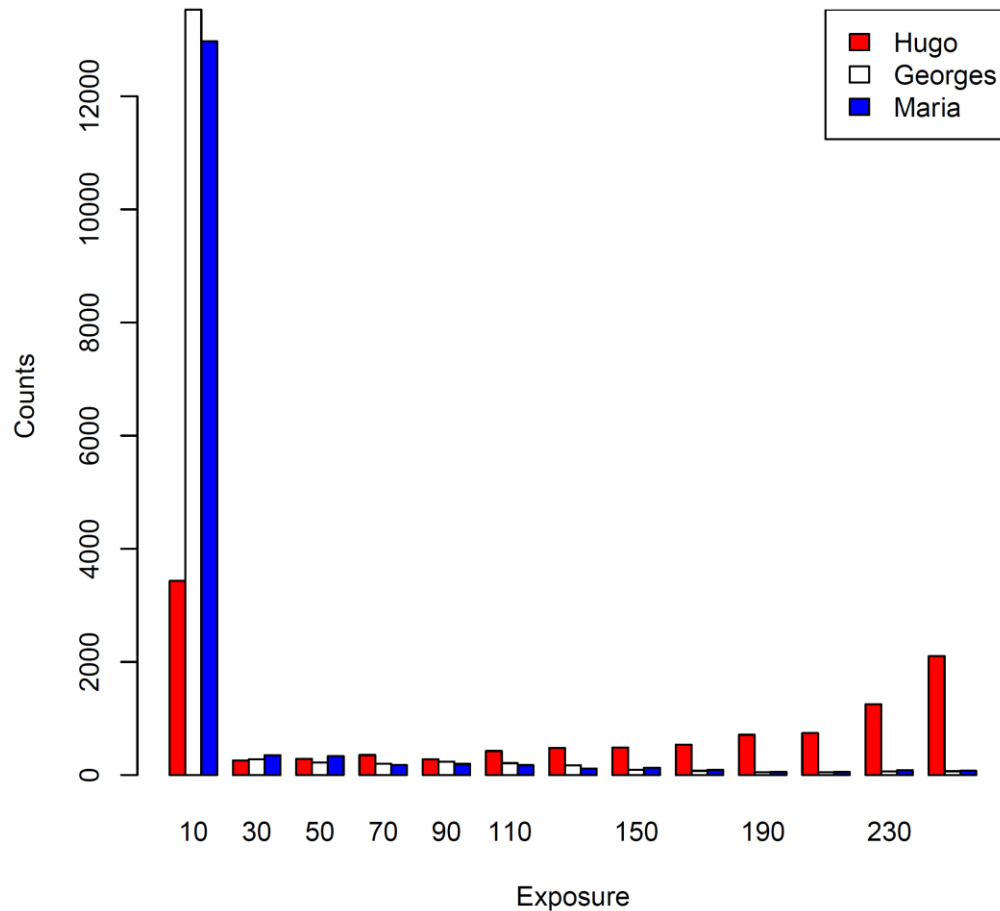

**Supplementary Figure 3.** Distribution of wind exposure for all stems of 24 study species during Hurricanes Hugo (red bars), Georges (white bars), and María (blue bars). The exposure index is 0 = no exposure and 255 = high exposure. The main reason for differences in exposure between Hugo and the other two storms is the track of the storms (Fig. 1A). Despite the fact that the maximum wind speed recorded for Maria was higher than Hugo or Georges, Hurricane Maria, like Georges, passed to the south side of the Luquillo Mountains, which protected the LFDP forest area on the northern slopes of the mountains from some of the wind force. Hurricane Hugo passed to the North of the Luquillo Mountains so the forest suffered greater exposure to this storm.
